# Supplementary material for: Molecular Guided Treatments in Gynecologic Oncology: Analysis of a Real‐World Precision Cancer Medicine Platform
Source: PubMed Central journal article supplement — Oncologist. 2020 May 8;25(7):e1060–9. doi: 10.1634/theoncologist.2019-0904 (PMC7356753; doi:10.1634/theoncologist.2019-0904), 2020-05-08
Supplement: ONCO-25-e1060-s001.pdf [file ONCO-25-e1060-s001.pdf]

Supplemental Appendix for:  
Molecular guided treatments in Gynecologic Oncology analysis of a real-world precision cancer medicine platform  
Hossein Taghizadeh et al.

List of gene targets in OncoPrint Comprehensive Assay v3 (Thermo Fisher Scientific, Waltham, MA, USA) – 161 genes

| Hotspot genes | Full-length genes | Copy number genes | Gene fusions (inter- and intragenic) |
|---------------|-------------------|-------------------|--------------------------------------|
| AKT1          | ATM               | AKT1              | ALK                                  |
| ALK           | BAP1              | AR                | AXL                                  |
| AR            | BRCA1             | CCND1             | BRAF                                 |
| ARAF          | BRCA2             | CCNE1             | EGFR                                 |
| BRAF          | CDKN2A            | CDK4              | ERBB2                                |
| BTK           | FBXW7             | CDK6              | ERG                                  |
| CBL           | MSH2              | EGFR              | ETV1                                 |
| CDK4          | NF1               | ERBB2             | ETV4                                 |
| CHEK2         | NF2               | FGFR1             | ETV5                                 |
| CSF1R         | NOTCH1            | FGFR2             | FGFR1                                |
| CTNNB1        | PIK3R1            | FGFR3             | FGFR2                                |
| DDR2          | PTCH1             | FGFR4             | FGFR3                                |
| EGFR          | PTEN              | FLT3              | NTRK1                                |
| ERBB2         | RB1               | IGF1R             | NTRK3                                |
| ERBB3         | SMARCB1           | KIT               | PDGFRA                               |
| ERBB4         | STK11             | KRAS              | PPARG                                |
| ESR1          | TP53              | MDM2              | RAF1                                 |
| EZH2          | TSC1              | MDM4              | RET                                  |
| FGFR1         | TSC2              | MET               | ROS1                                 |
| FGFR2         | ARID1A            | MYC               | AKT2                                 |
| FGFR3         | ATR               | MYCL              | AR                                   |
| FLT3          | ATRX              | MYCN              | BRCA1                                |
| FOXL2         | CDK12             | PDGFRA            | BRCA2                                |
| GATA2         | CDKN1B            | PIK3CA            | CDKN2A                               |
| GNA11         | CDKN2B            | PPARG             | ERBB4                                |
| GNAQ          | CHEK1             | TERT              | ESR1                                 |
| GNAS          | CREBBP            | AKT2              | FGR                                  |
| HNF1A         | FANCA             | AKT3              | FLT3                                 |
| HRAS          | FANCD2            | ALK               | JAK2                                 |
| IDH1          | FANCI             | AXL               | KRAS                                 |
| IDH2          | MLH1              | BRAF              | MDM4                                 |
| JAK1          | MRE11A            | CCND2             | MET                                  |
| JAK2          | MSH6              | CCND3             | MYB                                  |
| JAK3          | NBN               | CDK2              | MYBL1                                |
| KDR           | NOTCH2            | CDKN2A            | NF1                                  |
| KIT           | NOTCH3            | CDKN2B            | NOTCH1                               |
| KNSTRN        | PALB2             | ESR1              | NOTCH4                               |
| KRAS          | PMS2              | FGF19             | NRG1                                 |
| MAGOH         | POLE              | FGF3              | NTRK2                                |
| MAP2K1        | RAD50             | FGF3              | NUTM1                                |
| MAP2K2        | RAD51             | NTRK1             | PDGFRB                               |
| MAPK1         | RAD51B            | NTRK2             | PIK3CA                               |
| MAX           | RAD51C            | NTRK3             | PRKACA                               |
| MED12         | RAD51D            | PDGFRB            | PRKACB                               |
| MET           | RNF43             | PIK3CB            | PTEN                                 |
| MTOR          | SETD2             | RICTOR            | RAD51B                               |
| MYD88         | SLX4              | TSC1              | RB1                                  |
| NFE2L2        | SMARCA4           | TSC2              | RELA                                 |
| NRAS          |                   |                   | RSPO2                                |
| PDGFRA        |                   |                   | RSPO3                                |
| PIK3CA        |                   |                   | TERT                                 |
| PPP2R1A       |                   |                   |                                      |
| PTPN11        |                   |                   |                                      |
| RAC1          |                   |                   |                                      |
| RAF1          |                   |                   |                                      |

Supplemental Appendix for:  
Molecular guided treatments in Gynecologic Oncology analysis of a real-world precision cancer medicine platform  
Hossein Taghizadeh et al.

|                                                                                                                                                                                                                                                                     |  |  |  |
|---------------------------------------------------------------------------------------------------------------------------------------------------------------------------------------------------------------------------------------------------------------------|--|--|--|
| RET<br>RHEB<br>RHOA<br>SF3B1<br>SMO<br>SPOP<br>SRC<br>STAT3<br>U2AF1<br>XPO1<br>AKT2<br>AKT3<br>AXL<br>CCND1<br>CDK6<br>ERCC2<br>FGFR4<br>H3F3A<br>HIST1H3B<br>MAP2K4<br>MDM4<br>MYC<br>MYCN<br>NTRK1<br>NTRK2<br>PDGFRB<br>PIK3CB<br>ROS1<br>SMAD4<br>TERT<br>TOP1 |  |  |  |
|---------------------------------------------------------------------------------------------------------------------------------------------------------------------------------------------------------------------------------------------------------------------|--|--|--|
